# Supplementary material for: Experimental and theoretical evidence of charge transfer in multi-component alloys – how chemical interactions reduce atomic size mismatch
Source: Royal Society of Chemistry journal article supplement (doi:10.1039/d1qm00380a), 2021-01-01
Supplement: d1qm00380a1.pdf [file d1qm00380a1.pdf]

## Electronic supplementary information (ESI)

### Experimental and theoretical evidence of charge transfer in multi-component alloys – how chemical interactions reduce atomic size mismatch

Luis Casillas Trujillo,<sup>a</sup> Barbara Osinger,<sup>b</sup> Rebecka Lindblad,<sup>b</sup> Dennis Karlsson,<sup>b</sup> Alexei I. Abrikosov,<sup>c</sup> Stefan Fritze,<sup>b</sup> Kristina von Fieandt,<sup>b</sup> Björn Alling,<sup>a</sup> Ingrid Hotz,<sup>c</sup> Ulf Jansson,<sup>b</sup> Igor A. Abrikosov<sup>a,d</sup> and Erik Lewin<sup>\*b</sup>

#### Supplementary figures

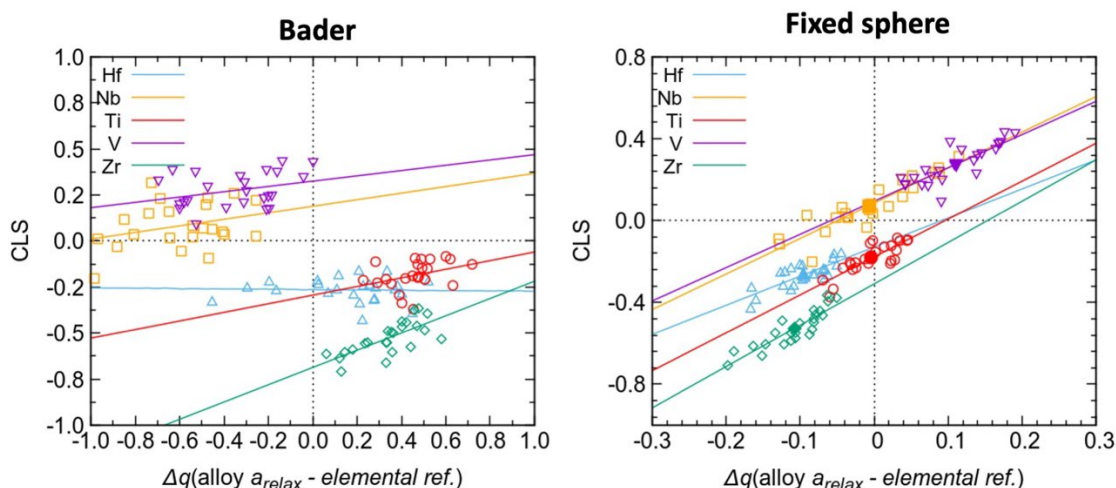

Figure S1 Calculated core level shifts for all 120 atoms in the supercell versus charge transfer compared to elemental references, calculated using the Bader (left) and fixed sphere (right) models, i.e. all individual values giving the average  $\Delta q(\text{alloy } a_{\text{relax}} - \text{elemental ref.})$ .

Figure S1 shows a comparison between the Bader and fixed sphere approaches. The fixed sphere model presents a better correlation between CLS and charge transfer. We believe that this approach captures the relevant aspects pertinent to CLS. Also, one can notice the difference in sign in the charge transfer between the approaches. In the Bader case, the charge transfer is associated with the relaxed volume. Large atoms Hf and Zr which reduce in size, and therefore have a smaller Bader volume enclose less electrons and thus losing negative charge.

<sup>a</sup> Department of Physics, Chemistry and Biology (IFM), Linköping University, SE-581 83 Linköping, Sweden

<sup>b</sup> Inorganic chemistry, Department of chemistry – Ångström Laboratory, Uppsala University, Box 538, SE-751 21 Uppsala, Sweden

<sup>c</sup> Department of Science and Technology, Linköping University, SE-581 83 Norrköping, Sweden

<sup>d</sup> Materials Modelling and Development Laboratory, National University of Science and Technology "MISIS," Moscow 119049, Russia

\* Author to whom correspondence should be addressed: erik.lewin@kemi.uu.se.

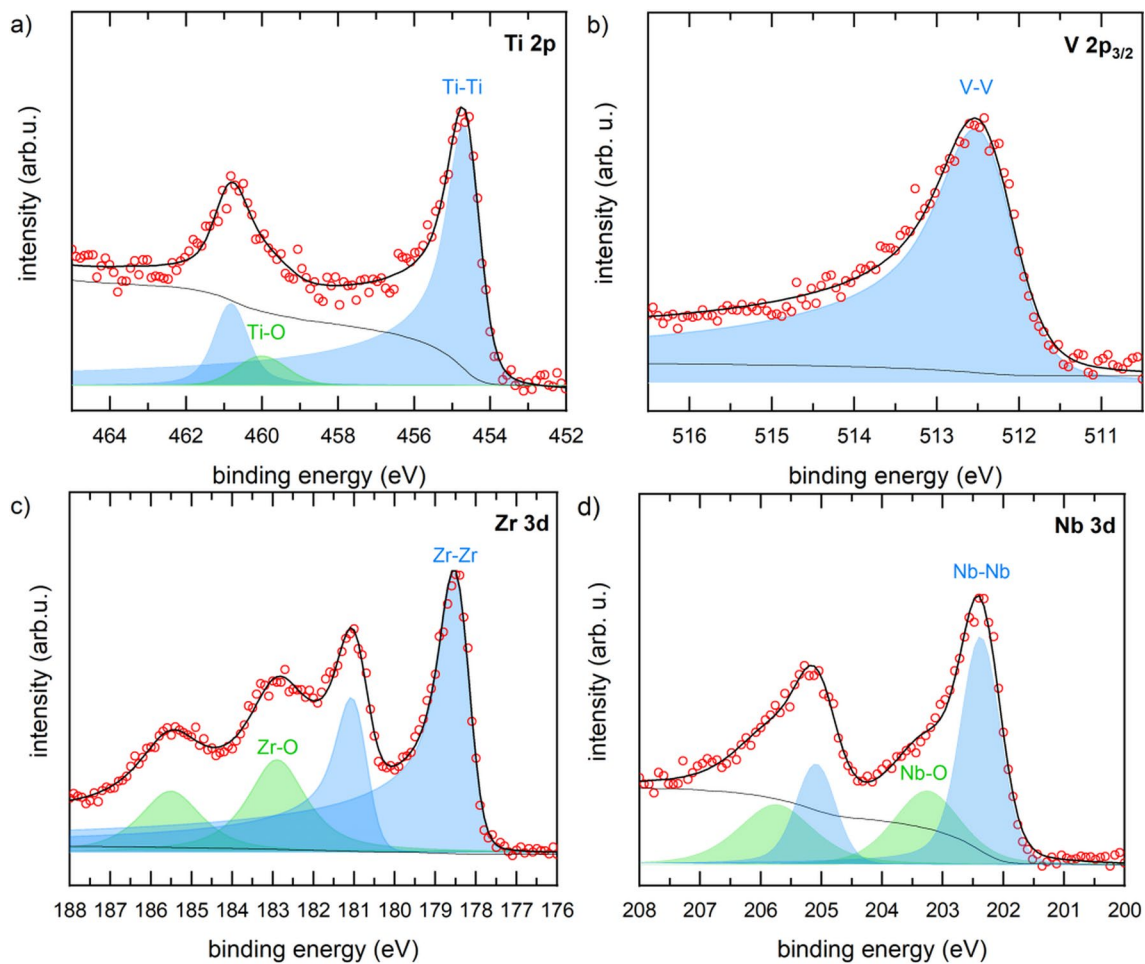

Figure S2 Peak fittings of the core level spectra from the  $\text{Hf}_{22}\text{Nb}_{19}\text{Ti}_{18}\text{V}_{19}\text{Zr}_{21}$  thin film. Experimental data points as circles and the sum of the different contributions as the thicker black line. Metallic contributions shown in blue, and oxide contributions in green. Shirley background shown as thinner black line. The peak fitting of Hf 4f is shown in the main manuscript, Figure 11f.
